# Supplementary figures and images for: Targeting of distinct signaling cascades and cancer-associated fibroblasts define the efficacy of Sorafenib against prostate cancer cells
Source: Springer Nature journal article supplement (doi:10.1038/cddis.2012.1), 2012-01-26

Supplementary figure 1

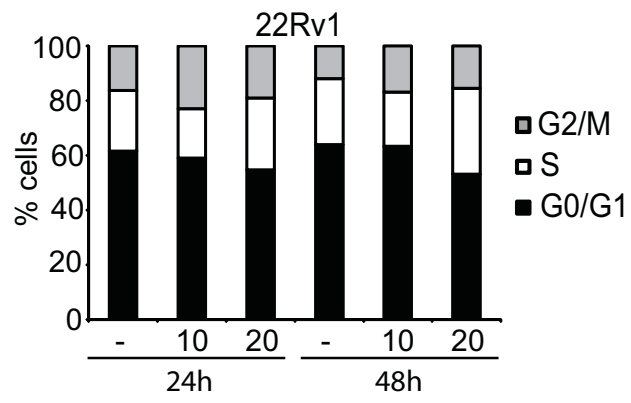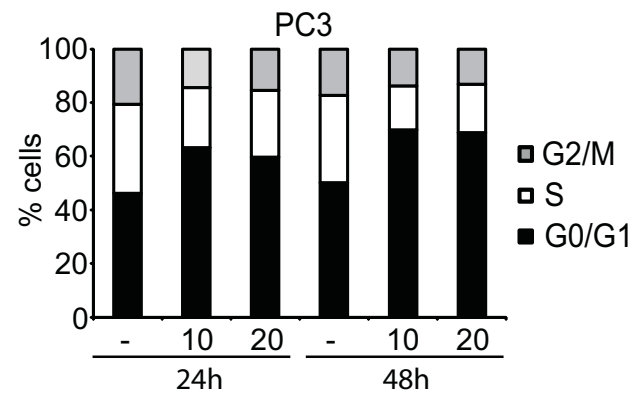

## Supplementary figure 2

**a**

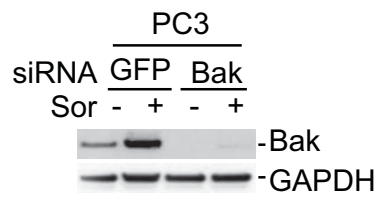

**b**

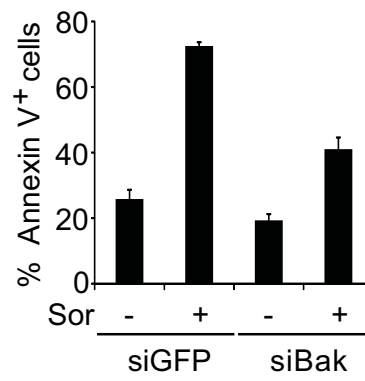

### Supplementary figure 3

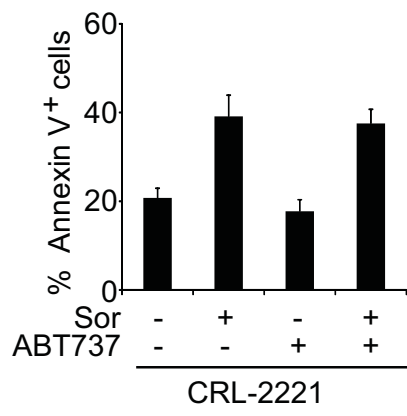

Supplement: 41419_2012_BFcddis20121_MOESM23_ESM.pdf [file 41419_2012_BFcddis20121_MOESM23_ESM.pdf]
